# Supplementary material
Source: Royal Society of Chemistry journal article supplement (doi:10.1039/d6ma00048g)
Supplement: d6ma00048g1.pdf [file d6ma00048g1.pdf]

## Supporting Information

### 1. $SbI_3$ saturation

**Table S1:**  $SbI_3$  mass needed to saturate a volume of  $43\text{ cm}^3$  (Petri dish). Saturation pressures obtained from the Yaws Handbook of vapor pressure. <sup>1</sup>

| Temperature (°C) | $P_{\text{sat}}$ (bar) | Saturation mass (mg) |
|------------------|------------------------|----------------------|
| 200              | 0.006                  | 3.37                 |
| 230              | 0.016                  | 8.44                 |
| <b>250</b>       | 0.032                  | 16.24                |
| 270              | 0.056                  | 27.37                |
| <b>300</b>       | 0.13                   | 60.21                |
| 320              | 0.2                    | 89.51                |
| <b>350</b>       | 0.39                   | 166.14               |
| <b>400</b>       | 1                      | 394.36               |
| <b>450</b>       | 2.13                   | 781.91               |

### 2. Summary of conditions

**Table S2:** Summary of synthesis conditions used in this work

| ID       | Temperature (°C) | Starting pressure (bar) | Final pressure (bar) | Duration (min) | Total time (min) |
|----------|------------------|-------------------------|----------------------|----------------|------------------|
| <b>A</b> | 250              | 4.5                     | 5.7                  | 1              | 26               |
| <b>B</b> | 250              | 4.5                     | 5.7                  | 5              | 30               |
| <b>C</b> | 250              | 4.5                     | 5.8                  | 10             | 35               |
| <b>D</b> | 250              | 4.5                     | 5.8                  | 30             | 55               |
| <b>E</b> | 250              | 4.5                     | 5.9                  | 45             | 70               |
| <b>G</b> | 450              | 4.5                     | 7.3                  | 1              | 46               |
| <b>I</b> | 450              | 4.5                     | 7.4                  | 5              | 50               |
| <b>J</b> | 450              | 4.5                     | 7.6                  | 10             | 55               |
| <b>H</b> | 450              | 4.5                     | 7.8                  | 30             | 75               |
| <b>F</b> | 450              | 4.5                     | 7.9                  | 45             | 90               |
| <b>K</b> | 300              | 4.5                     | 6.0                  | 5              | 35               |
| <b>L</b> | 350              | 4.5                     | 6.2                  | 5              | 40               |
| <b>M</b> | 400              | 4.5                     | 6.8                  | 5              | 45               |

### 3. Morphological characterization

#### 3.1. Low temperature regime morphological evolution

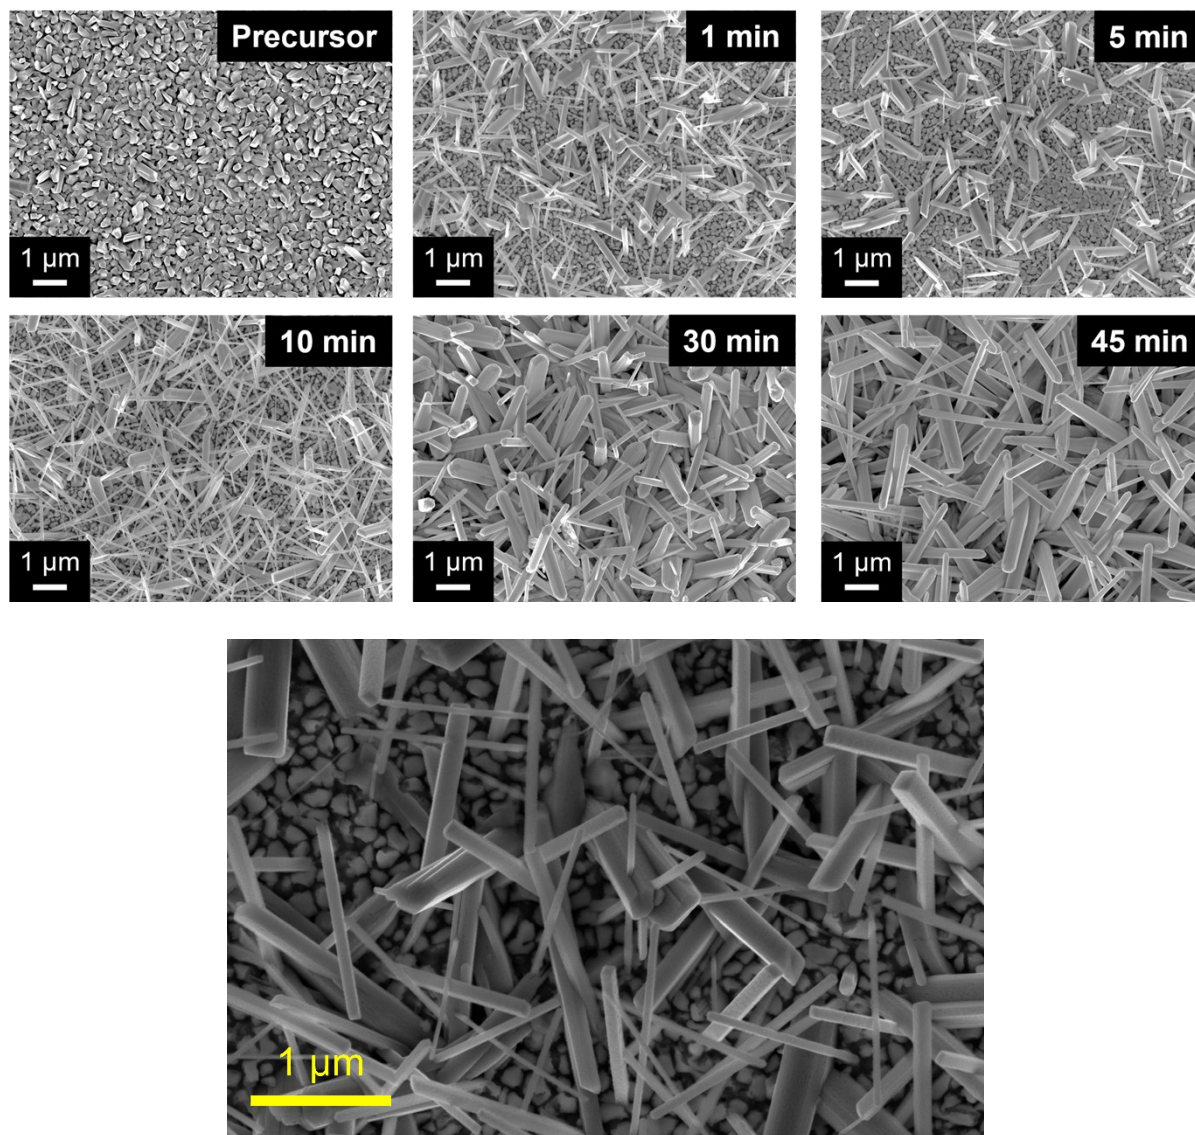

**Figure S1:** Top-down SEM images showing the morphological evolution of SbSeI thin films in the low-temperature regime (250 °C) as a function of annealing time. Bottom: Zoomed image of the earliest nucleation stage captured.

### 3.2. Transition regime morphological evolution

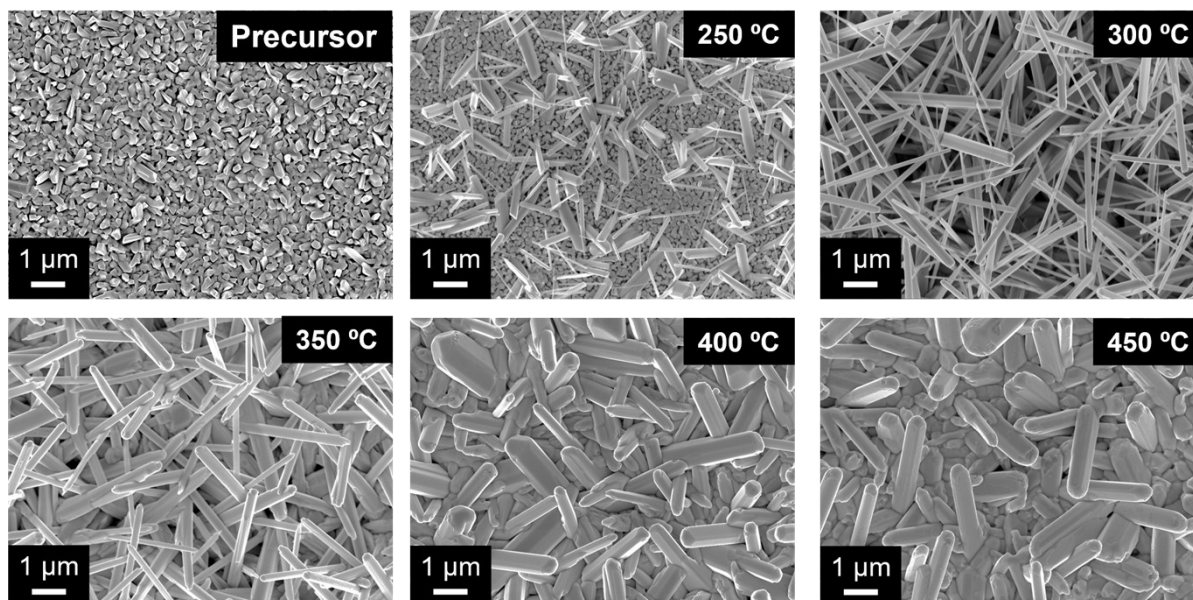

*Figure S2: Top-down SEM images showing the morphological evolution of SbSeI thin films in the temperature transition regime.*

### 3.3. High temperature regime morphological evolution

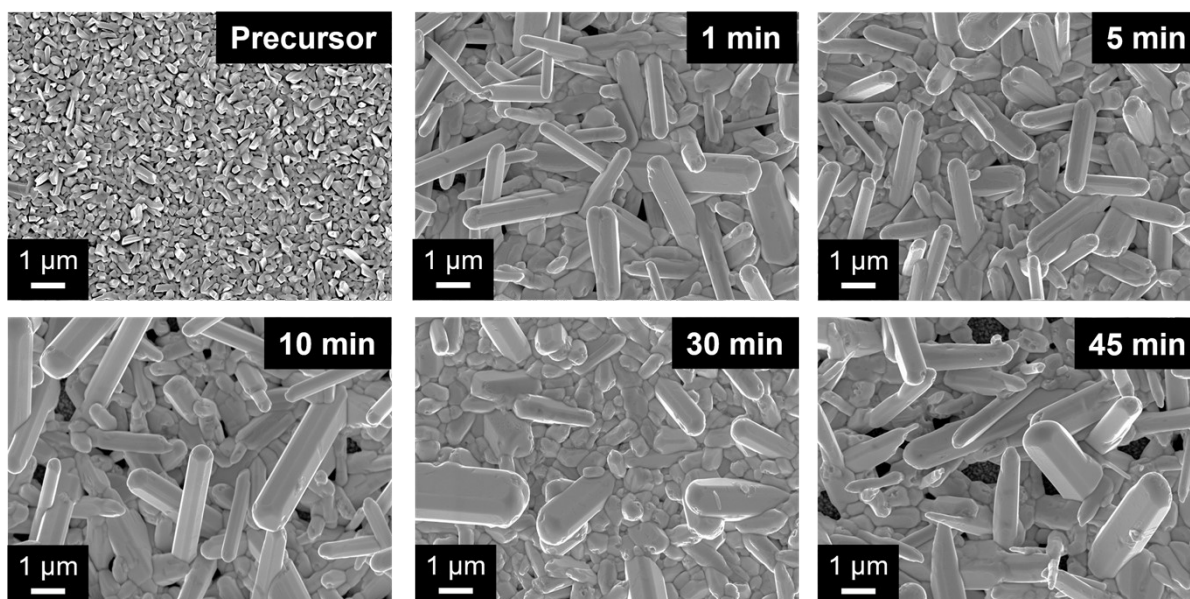

*Figure S3: Top-down SEM images showing the morphological evolution of SbSeI thin films in the high-temperature regime (450 °C) as a function of annealing time.*

### 3.4. Cross-sectional images

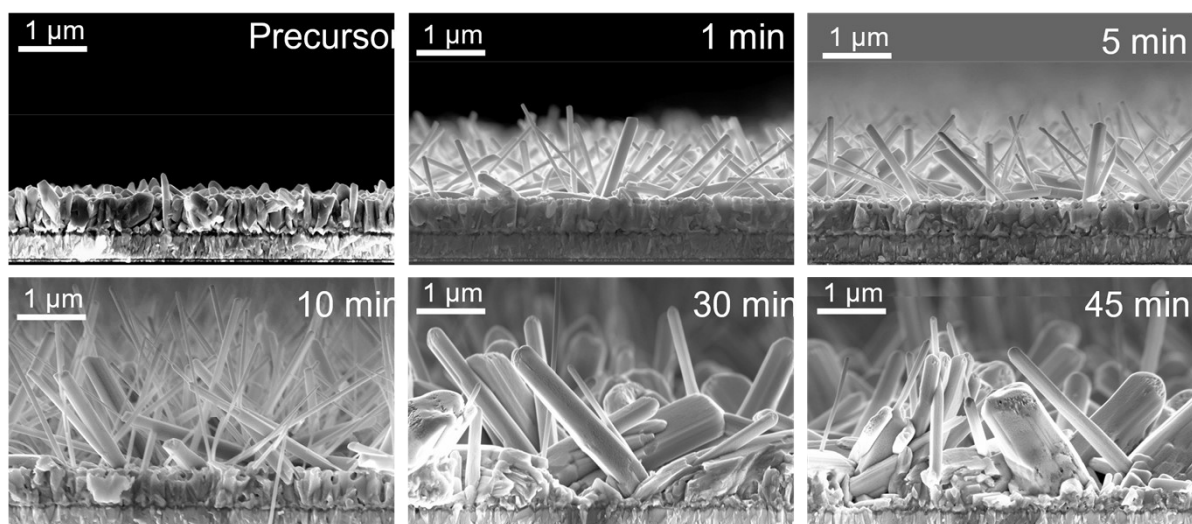

**Figure S4:** Cross-sectional SEM images showing the morphological evolution of SbSeI thin films in the low-temperature regime (250 °C) as a function of annealing time. The images reveal progressive needle growth from the substrate, with increasing length and slight thickening over time.

### 3.5. SEM-EDS Analysis

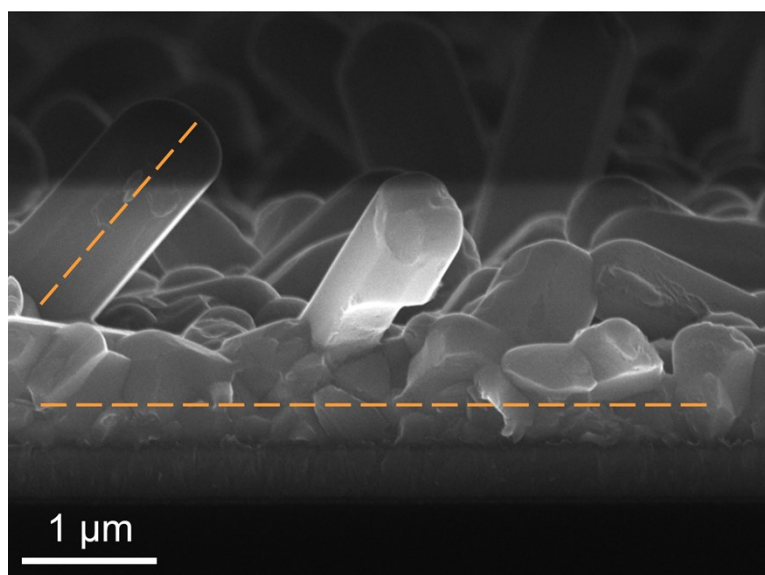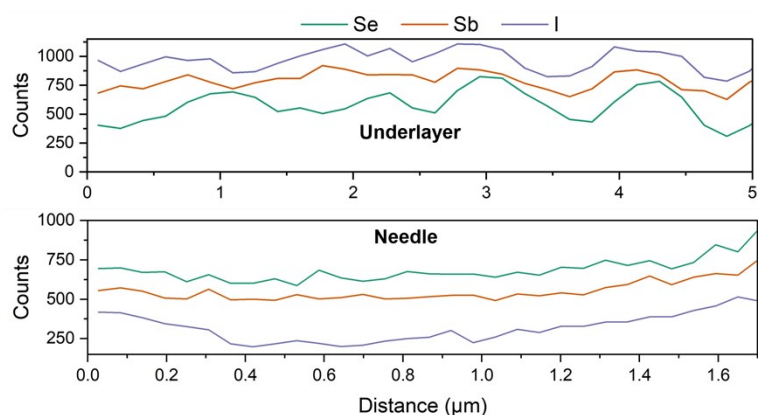

|                   |             |                           |
|-------------------|-------------|---------------------------|
| <b>Underlayer</b> | Sb : Se : I | 1.03 : 1.05 : 0.95 (rel.) |
| <b>Needle</b>     | Sb : Se : I | 1.12 : 0.90 : 1.01 (rel.) |

**Figure S5:** Top row: Cross-sectional SEM image of the sample processed at 450 °C for 30 min showing the under layer formed during the ramping to the high temperature regime. Mid row: SEM-EDS line scan of a single needle and of the underlying layer. Bottom row: Calculated compositions from a single needle and from the underlying layer showing close to stoichiometric proportions.

## 4. Structural characterization

### 4.1. Texture coefficient analysis

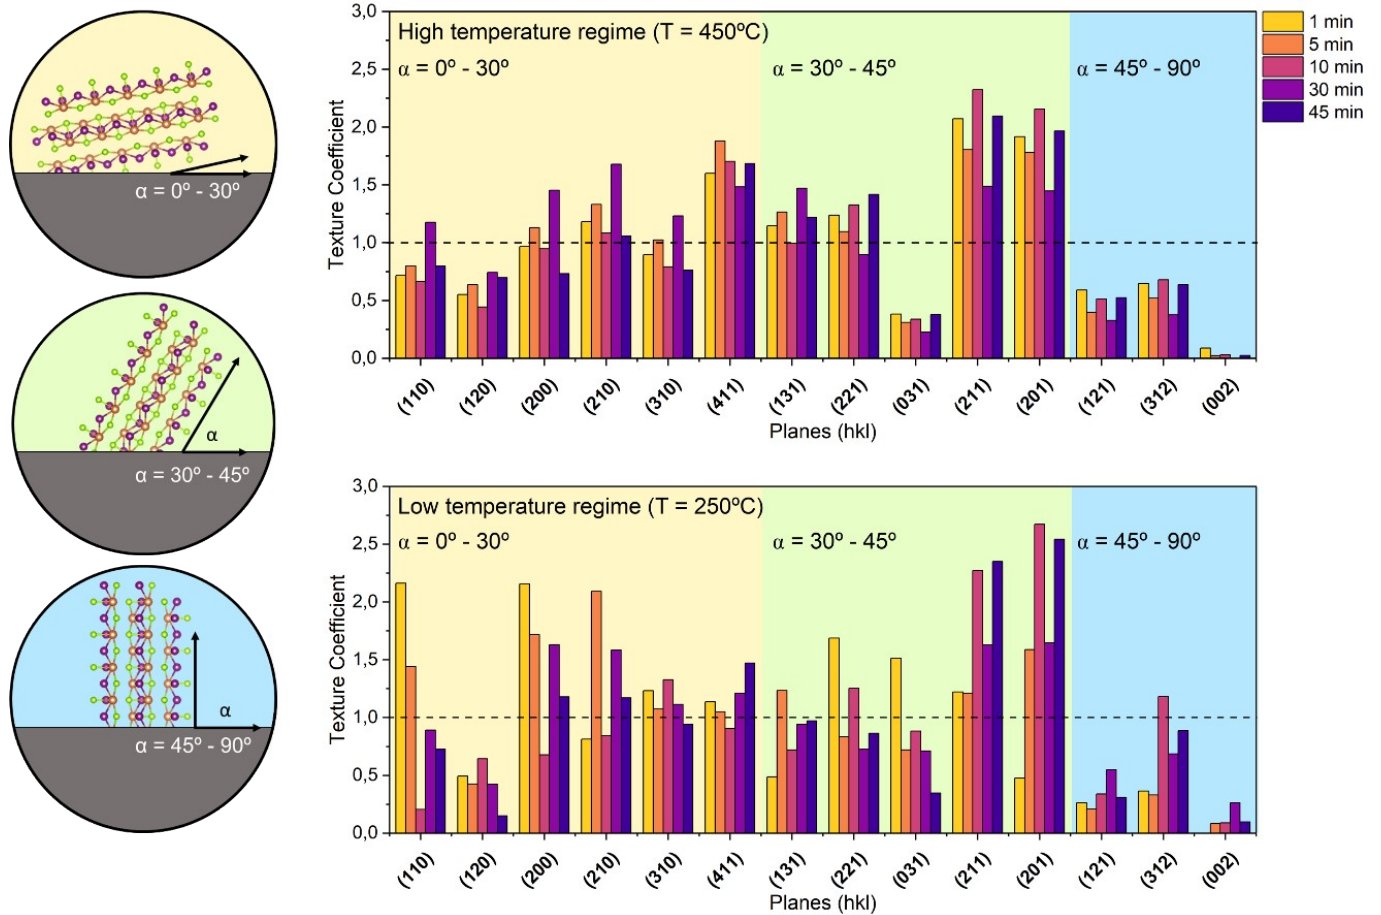

Figure S6: Texture coefficient (TC) of SbSeI planes as a function of processing time and tilt angle at low and high temperatures.

## 4.2. Low temperature structural evolution

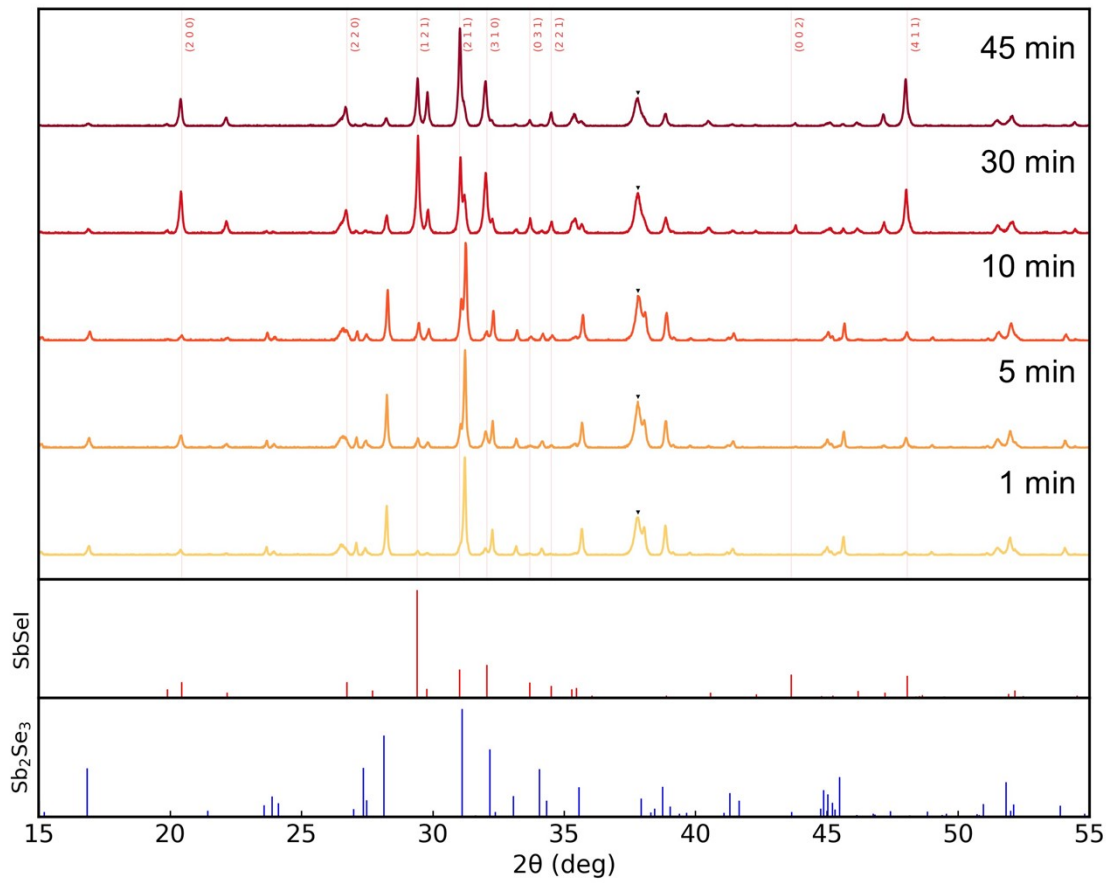

**Figure S7:** XRD patterns of SbSeI samples from the low-temperature (250 °C) time series.

### 4.3. Transition regime structural evolution

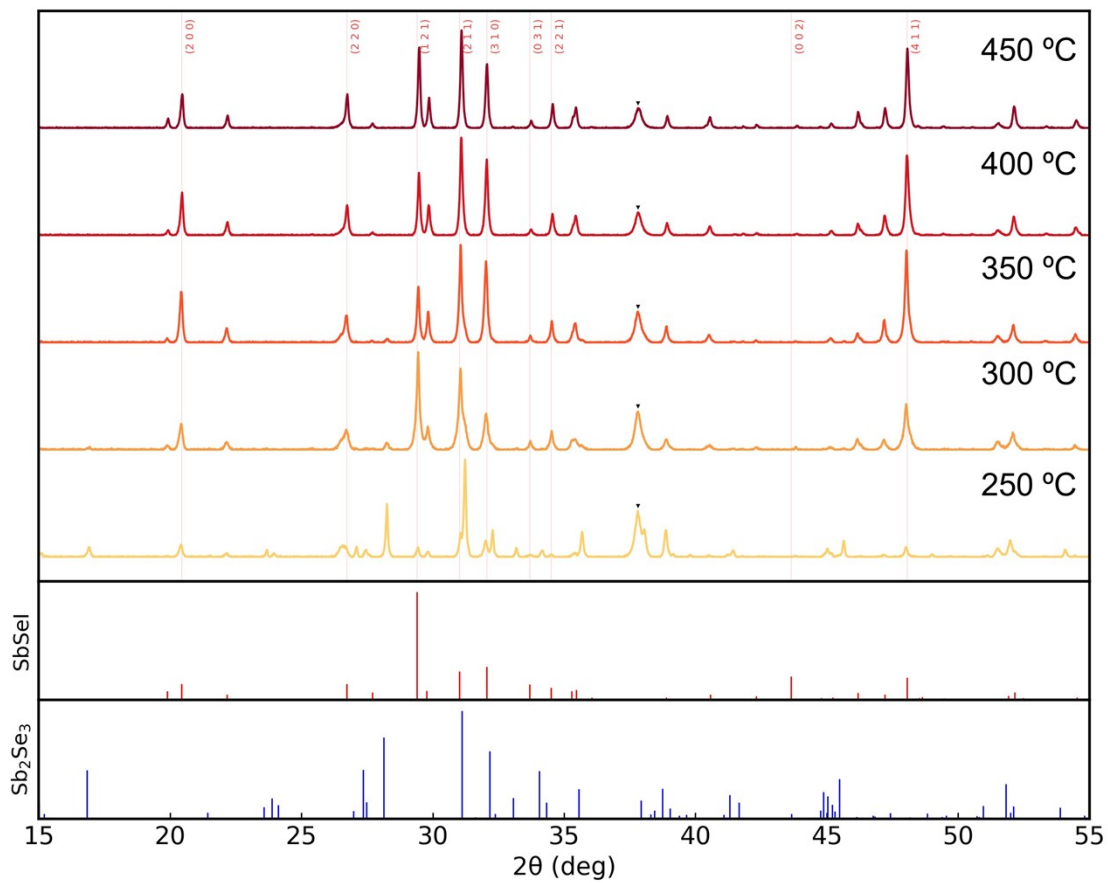

**Figure S8:** XRD patterns of SbSeI samples from the temperature-transition (300 – 400 °C) series.

#### 4.4. High temperature structural evolution

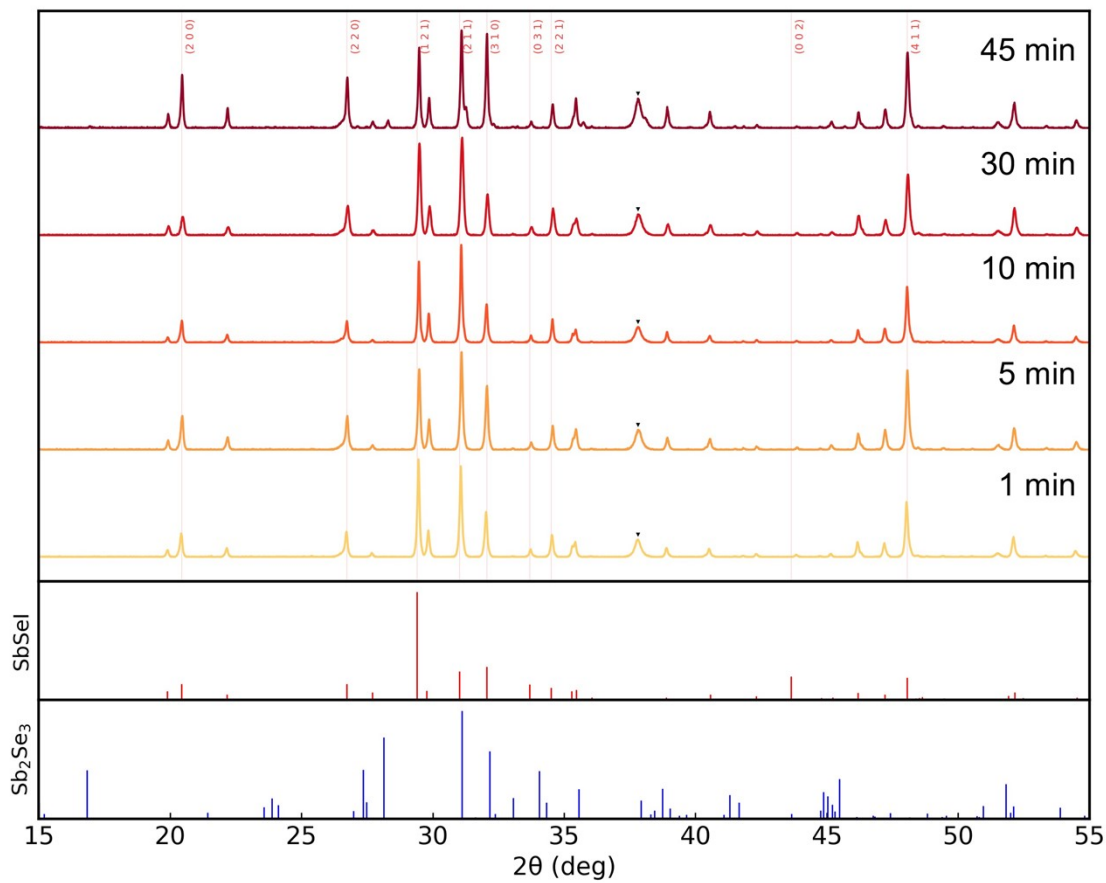

**Figure S9:** XRD patterns of SbSeI samples from the high-temperature (450 °C) time series. No significant changes are observed over time, indicating that the conversion reaction to SbSeI completed prior to reaching the target temperature.

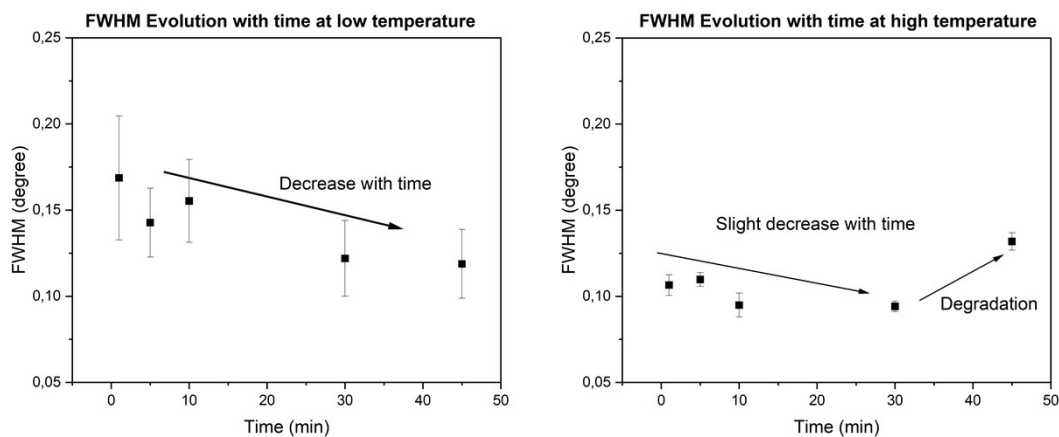

**Figure S11:** Evolution of the full width at half maximum (FWHM) of the main SbSeI diffraction peak as a function of annealing time for low- and high-temperature regimes. At low temperature, a slight decrease in FWHM is observed, indicating gradual crystallite growth and improved structural order. A similar trend is seen at high temperature up to 30 minutes, beyond which sample degradation occurs under these conditions, preventing longer processing times.

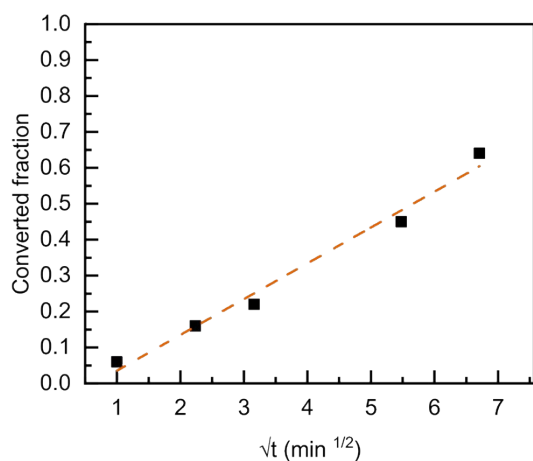

**Figure S12:** Evolution of the converted fraction, calculated from XRD peak ratios, as a function of the square root of time for the **low-temperature** series. X-intercept =  $0.64 \pm 0.28$ ; Slope =  $0.099 \pm 0.007$ ;  $R^2 = 0.98$ . The linear regression shows a small negative intercept on the Y-axis ( $-0.064$ ), which is attributed to the non-isothermal stage during the heating ramp (between 200 and 250 °C), where the reaction initiated slightly before the isothermal dwell time began.

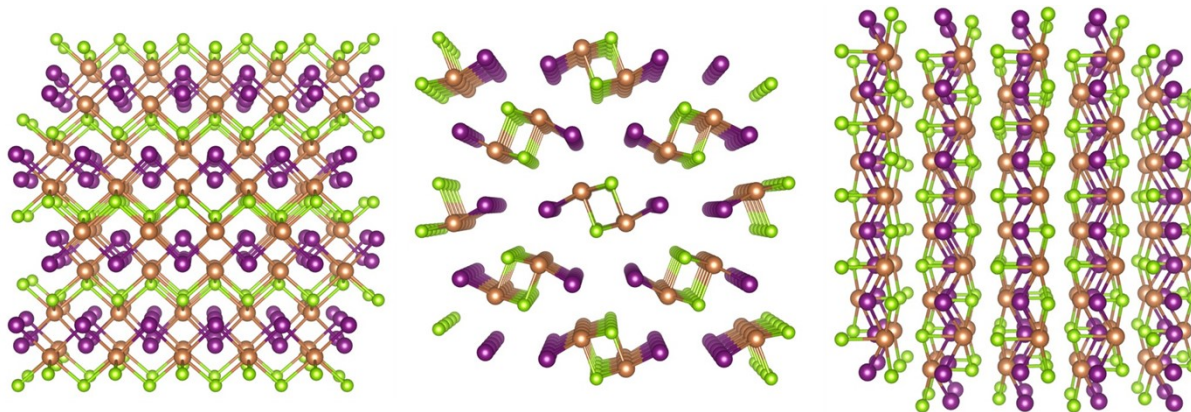

**Figure S13:** *SbSeI* crystallizes in the orthorhombic *Pnma* space group. The structure is one-dimensional and consists of two *SbSeI* ribbons oriented in the (001) direction.  $Sb^{3+}$  is bonded to three equivalent  $Se^{2-}$  and two equivalent  $I^{-}$  atoms to form edge-sharing  $SbSe_3I_2$  square pyramids. There are one shorter (2.64 Å) and two longer (2.84 Å)  $Sb-Se$  bond lengths. Both  $Sb-I$  bond lengths are 3.16 Å.  $Se^{2-}$  is bonded in a 3-coordinate geometry to three equivalent  $Sb^{3+}$  atoms.  $I^{-}$  is bonded in a distorted L-shaped geometry to two equivalent  $Sb^{3+}$  atoms. Orange spheres: antimony; Green spheres: selenium; Purple spheres: iodine

### Histograms, Distribution Fits, Q-Q Plots and SEM images with measured needles:

Table S3: Summary of the results of the statistical distributions of needle thicknesses for each condition. LN = Lognormal; W = Weibull

| Sample | Temp. (°C) | Time (min) | Distribution | K-S p-value | $\mu$     | $\sigma$  | $\lambda$  | $k$       |
|--------|------------|------------|--------------|-------------|-----------|-----------|------------|-----------|
| A      | 250        | 1          | LN           | 0.06        | 4.70±0.03 | 0.66±0.03 | -          | -         |
| B      | 250        | 5          | n/a          | -           | -         | -         | -          | -         |
| C      | 250        | 10         | n/a          | -           | -         | -         | -          | -         |
| D      | 250        | 30         | W            | >0.1        | -         | -         | 317.6±10.9 | 1.66±0.07 |
| E      | 250        | 45         | W            | >0.1        | -         | -         | 380.1±11.9 | 1.90±0.08 |
| G      | 450        | 1          | LN           | >0.1        | 6.20±0.02 | 0.33±0.01 | -          | -         |
| I      | 450        | 5          | LN           | >0.15       | 6.45±0.02 | 0.31±0.01 | -          | -         |
| J      | 450        | 10         | LN           | 0.15        | 6.25±0.02 | 0.29±0.01 | -          | -         |
| H      | 450        | 30         | LN           | >0.15       | 6.69±0.02 | 0.29±0.01 | -          | -         |
| F      | 450        | 45         | n/a          | -           | -         | -         | -          | -         |
| K      | 300        | 5          | LN           | >0.15       | 5.09±0.03 | 0.50±0.02 | -          | -         |
| L      | 350        | 5          | LN           | >0.15       | 5.79±0.02 | 0.40±0.02 | -          | -         |
| M      | 400        | 5          | LN           | >0.15       | 6.19±0.02 | 0.37±0.02 | -          | -         |

## Sample A:

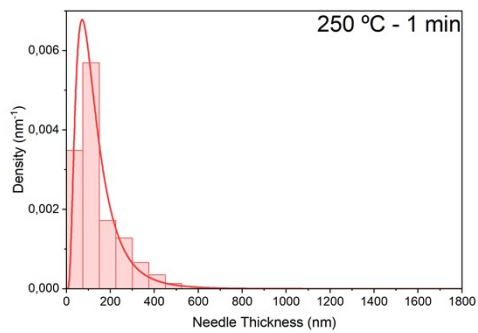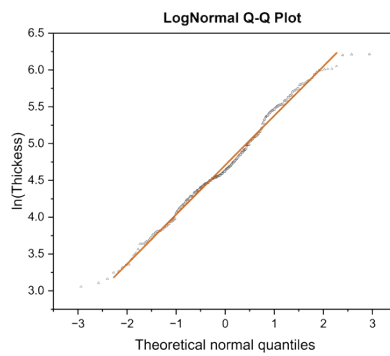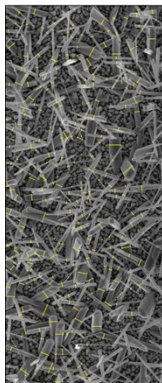

**Figure S14:** Top left: Histogram of needle diameters measured from Sample A. Top right: Q–Q plot comparing the empirical distribution to the fitted statistical model. Bottom: SEM image of Sample A (annealed isothermally at 250 °C for 1 minute), with the measured needles highlighted.

## Sample B:

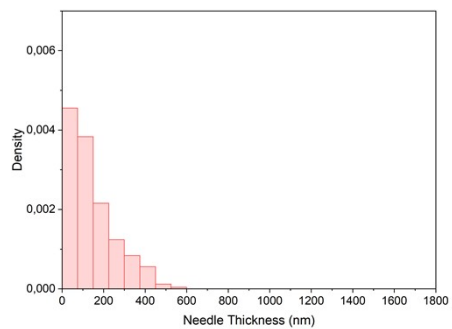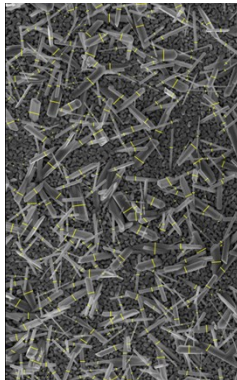

**Figure S15:** Top left: Histogram of needle diameters measured from Sample B. Top right: SEM image of Sample B (annealed isothermally at 250 °C for 5 minute), with the measured needles highlighted.

## Sample C:

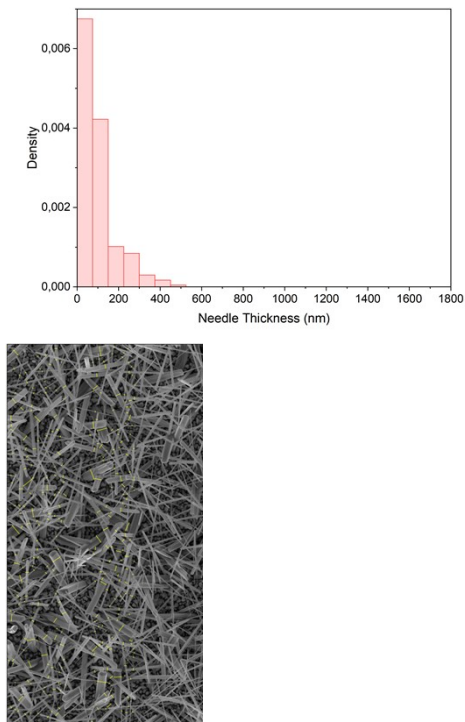

**Figure S16:** Top left: Histogram of needle diameters measured from Sample C. Top right: SEM image of Sample C (annealed isothermally at 250 °C for 10 minute), with the measured needles highlighted.

## Sample D:

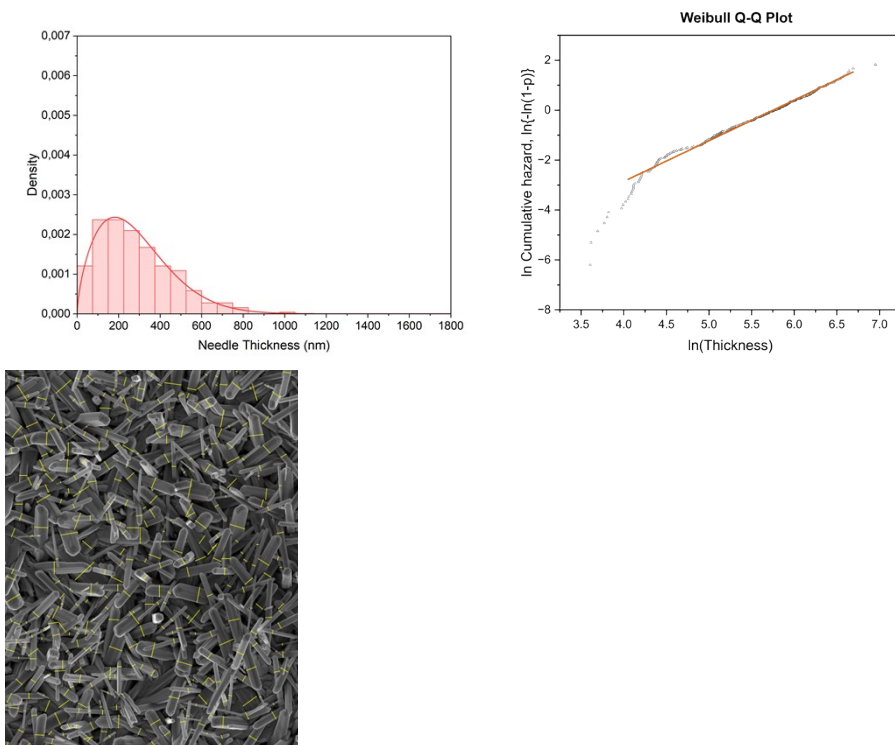

**Figure S17:** Top left: Histogram of needle diameters measured from Sample D. Top right: Q–Q plot comparing the empirical distribution to the fitted statistical model.  $R^2 = 0.98$ . The Q–Q plot shows tail deviations, fewer very thin needles and slightly heavier extreme tail, consistent with detection limits and projection/merging. Bottom: SEM image of Sample D (annealed isothermally at 250 °C for 30 minute), with the measured needles highlighted.

### Sample E:

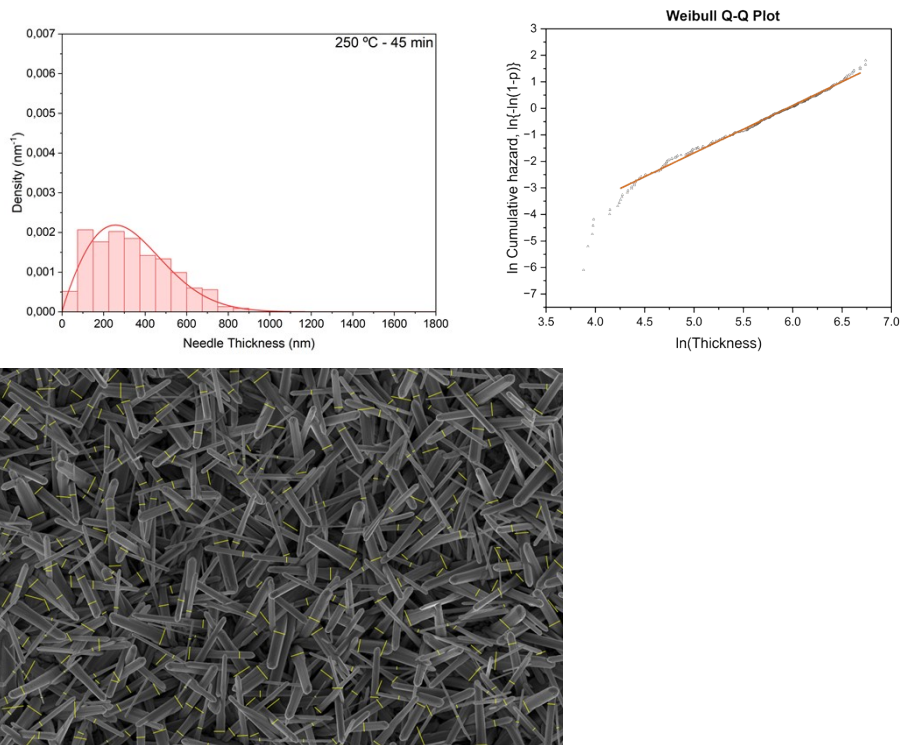

**Figure S18:** Top left: Histogram of needle diameters measured from Sample E. Top right: Q–Q plot comparing the empirical distribution to the fitted statistical model. Bottom: SEM image of Sample E (annealed isothermally at 250 °C for 45 minutes), with the measured needles highlighted.

### Sample F:

Degraded sample – Not measured

### Sample G:

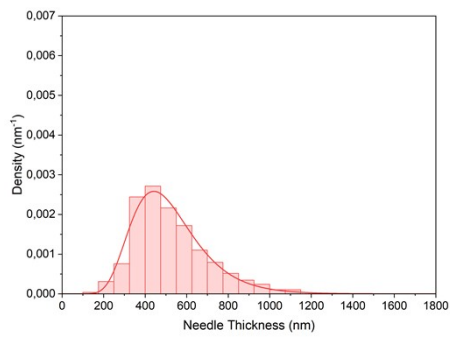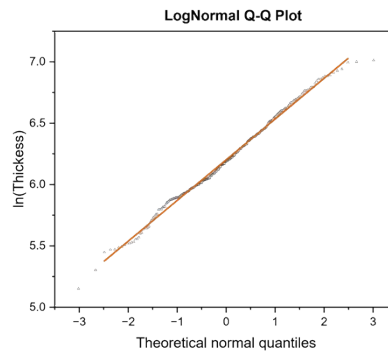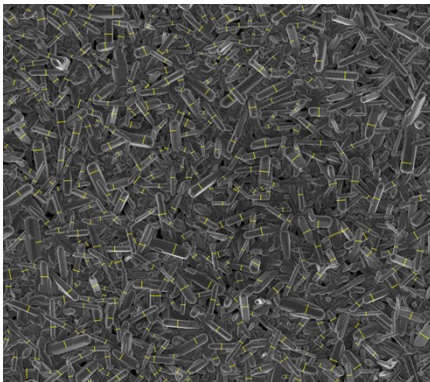

**Figure S19:** Top left: Histogram of needle diameters measured from Sample G. Top right: Q-Q plot comparing the empirical distribution to the fitted statistical model. Bottom: SEM image of Sample G (annealed isothermally at 450 °C for 1 minute), with the measured needles highlighted.

### Sample H:

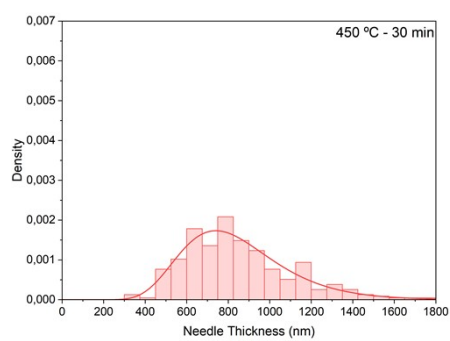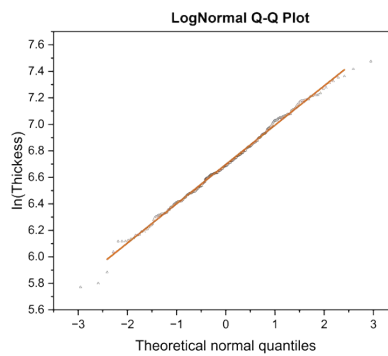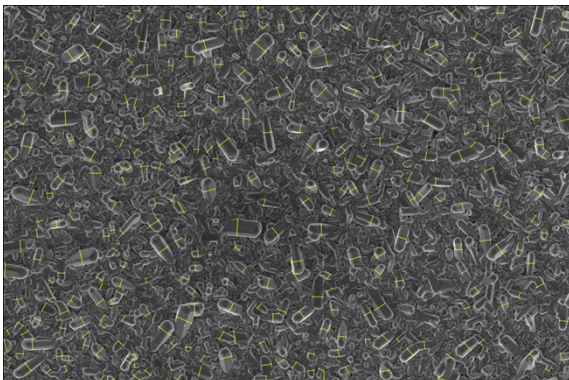

**Figure S20:** Top left: Histogram of needle diameters measured from Sample H. Top right: Q-Q plot comparing the empirical distribution to the fitted statistical model. Bottom: SEM image of Sample H (annealed isothermally at 450 °C for 30 minutes), with the measured needles highlighted.

### Sample I:

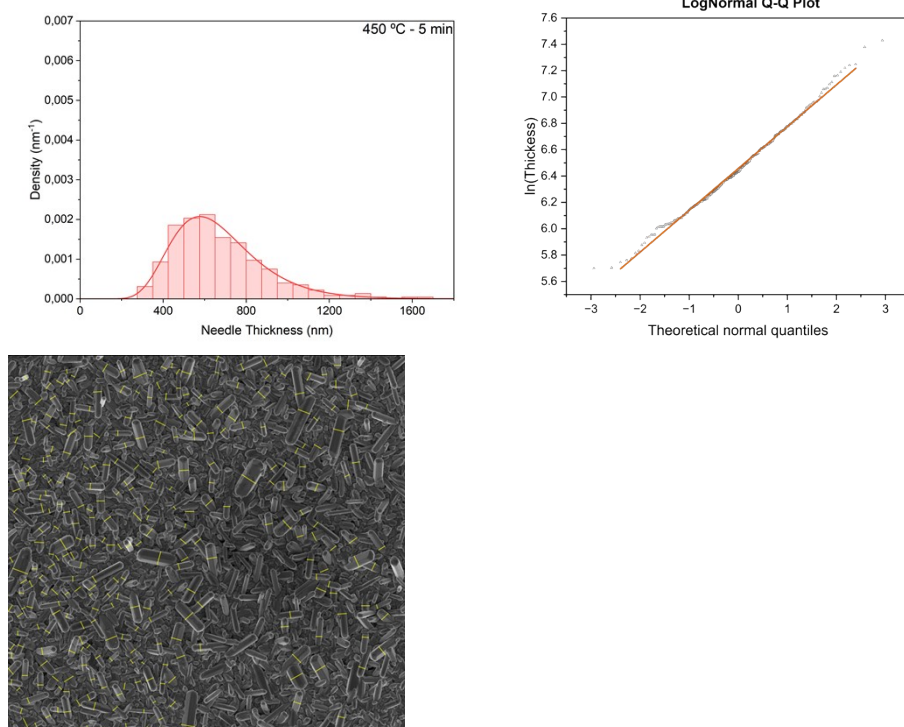

**Figure S21:** Top left: Histogram of needle diameters measured from Sample I. Top right: Q–Q plot comparing the empirical distribution to the fitted statistical model. Bottom: SEM image of Sample A (annealed isothermally at 450 °C for 5 minute), with the measured needles highlighted.

### Sample J:

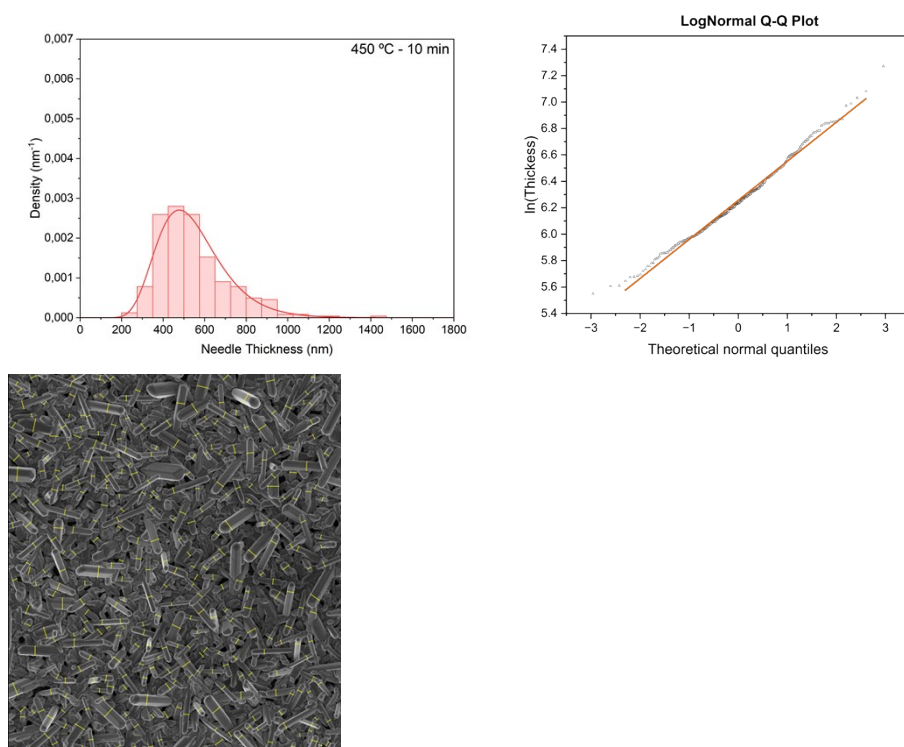

**Figure S22:** Top left: Histogram of needle diameters measured from Sample J. Top right: Q–Q plot comparing the empirical distribution to the fitted statistical model. Bottom: SEM image of Sample A (annealed isothermally at 450 °C for 10 minutes), with the measured needles highlighted.

### Sample K:

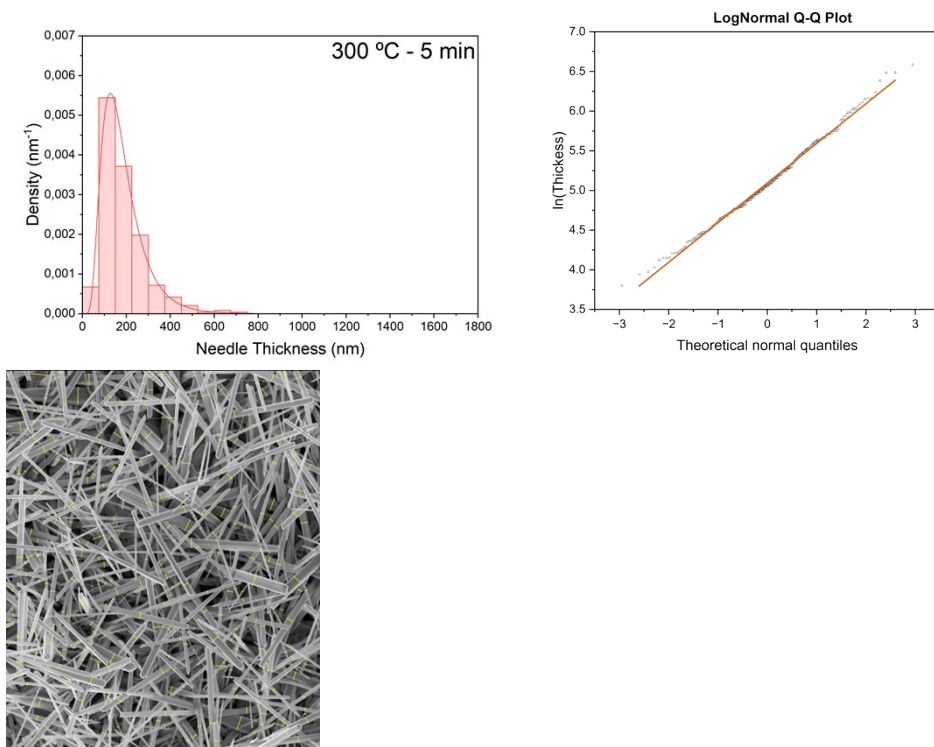

**Figure S23:** Top left: Histogram of needle diameters measured from Sample K. Top right: Q–Q plot comparing the empirical distribution to the fitted statistical model. Bottom: SEM image of Sample A (annealed isothermally at 300 °C for 5 minute), with the measured needles highlighted.

### Sample L:

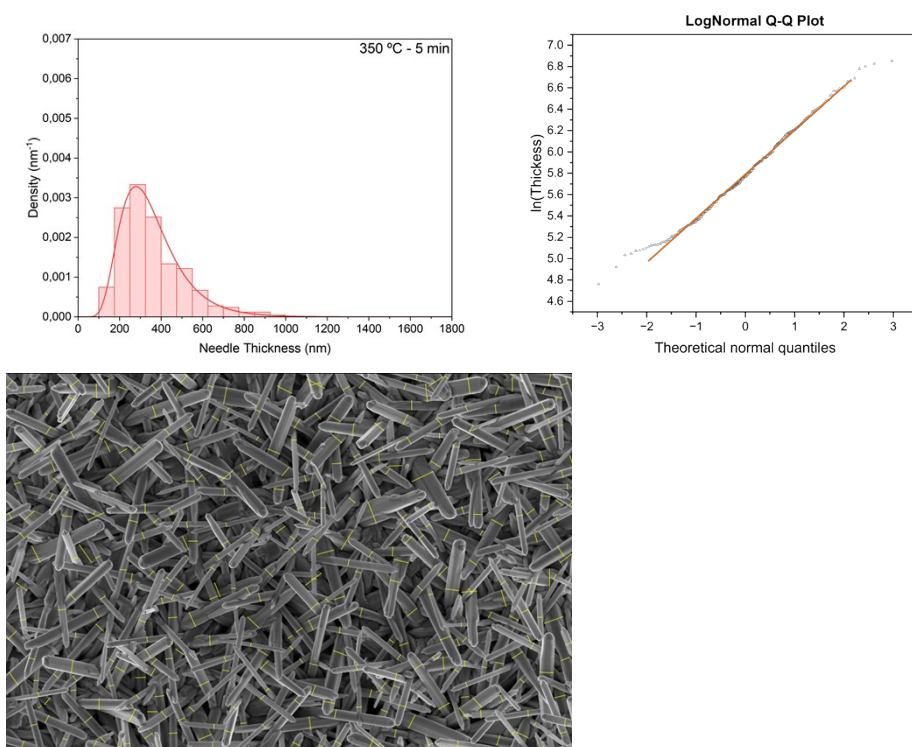

**Figure S24:** Top left: Histogram of needle diameters measured from Sample L. Top right: Q–Q plot comparing the empirical distribution to the fitted statistical model. Bottom: SEM image of Sample A (annealed isothermally at 350 °C for 5 minutes), with the measured needles highlighted.

## Sample M:

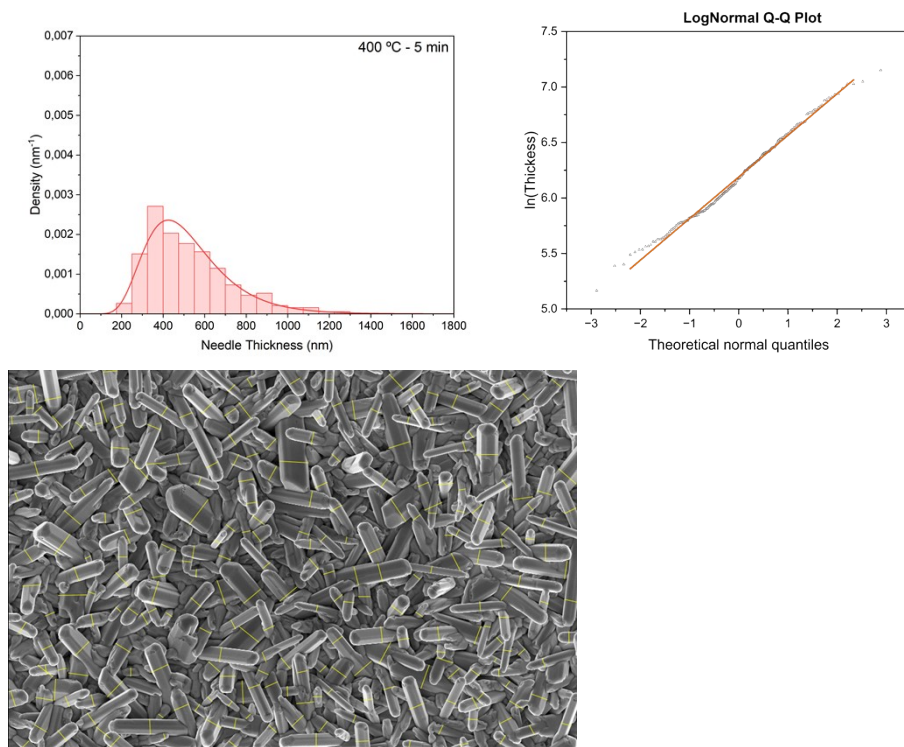

**Figure S25:** Top left: Histogram of needle diameters measured from Sample M. Top right: Q–Q plot comparing the empirical distribution to the fitted statistical model. Bottom: SEM image of Sample A (annealed isothermally at 400 °C for 5 minutes), with the measured needles highlighted.

- (1) Yaws, C. L. *The Yaws Handbook of Vapor Pressure: Antoine Coefficients*, Second edition.; Elsevier/GPP, Gulf Professional Publishing is an imprint of Elsevier: Amsterdam ; Boston, 2015.
